# Supplementary material
Source: publisher figshare collection journal article supplement (https://frontiersin.figshare.com/ndownloader/files/31255618)
Supplement: Supplementary file 1 [file 31255618]

**Metallic iron for environmental remediation: The fallacy of the electron efficiency concept**

Rui Hu 1, Arnaud Igor Ndé-Tchoupé 1, Viet Cao 2, Willis Gwenzi 3, Chicgoua Noubactep 4-7

1 School of Earth Science and Engineering, Hohai University, Fo Cheng Xi Road 8, 211100 Nanjing, P.R. China

2 Faculty of Natural Sciences, Hung Vuong University, Nguyen Tat Thanh Street, Viet Tri 35120, Phu Tho, Vietnam;

3 Biosystems and Environmental Engineering Research Group, Department of Soil Science and Agricultural Engineering, University of Zimbabwe, P.O. Box MP167, Mt. Pleasant, Harare, Zimbabwe;

4 Department of Water and Environmental Science and Engineering, Nelson Mandela African Institution of Science and Technology, Arusha P.O. Box 447, Tanzania;

5 Faculty of Science and Technology, Campus of Banekane, Université des Montagnes, P.O. Box 208 Bangangté, Cameroon;

6 Angewandte Geologie, Universität Göttingen, Goldschmidtstraße 3, D - 37077 Göttingen, Germany;

7 Centre for Modern Indian Studies (CeMIS), University of Göttingen, Waldweg 26, 37073 Göttingen, Germany.

e-mails: [cnoubac@gwdg.de](mailto:cnoubac@gwdg.de)

**Table S1**: Bibliometry of the peer-reviewed articles using Fe0 PRBs in water remediation published in 1994. Data are from Scopus and ScienceDirect ([www.scopus.com](http://www.scopus.com/): 24/02/2021).

| **Title** | **Journal** | **IF** | **Citation** | **Citation*** |
| --- | --- | --- | --- | --- |
| Enhanced degradation of halogenated aliphatics by zero-valent iron | Ground Water | 2.322 | 1047 | 1015 |
| Degradation of carbon tetrachloride in the presence of iron and sulphur containing compounds | Chemosphere | 5.108 | 111 | 110 |
| Reductive dehalogenation of chlorinated methanes by iron metal | Environ. Sci.  Technol. | 7.149 | 1174 | 1147 |
| Transformation of chlorinated organic compounds by iron and manganese powders in buffered water and in landfill leachate | Chemosphere | 5.108 | 94 | 88 |

Table S1 presents a summary of the bibliometry of the peer-reviewed articles using Fe0 PRBs in water remediation published in 1994. It is seen that the articles have different resonance within the research community during the past 26 years. “Citation” is the total number of citations, and “Citation*” excludes self-citations. It is seen that both articles from Chemosphere were self-referenced only 1 and 6 times. The two other were self-referenced more than 25 times.
